# Supplementary material for: Marker-Assisted Selection in Breeding for Fruit Trait Improvement: A Review
Source: MDPI journal article supplement (doi:10.3390/ijms24108984), 2023-05-19
Supplement: s1 [file s1]

**Supplementary Table S1.** List of the most relevant references on MAS breeding

| <i>Character</i>                                          | <i>Species</i> | <i>References</i>           | <i>DOI</i>                        |
|-----------------------------------------------------------|----------------|-----------------------------|-----------------------------------|
| <i>Phenological traits related to fruit production</i>    | Apricot        | Campoy et al., 2011         | 10.1007/s11105-010-0242-9         |
|                                                           | Peach          | Dirlewanger et al., 2006    | 10.1007/s11295-006-0053-1         |
|                                                           | Kaki           | Akagi et al., 2014          | 10.2503/jjshs1.CH-109             |
|                                                           | Ginco          | Liao et al., 2009           | 10.1007/S10681-009-9913-8         |
|                                                           | Kiwifruit      | De Mori et al., 2022        | 10.3233/JBR-211530                |
|                                                           | Mulberry       | Atsumi et al., 2019         | 10.1007/S10681-019-2511-5         |
|                                                           | Papaya         | Vashistha et al., 2016      | 10.5376/MPB.2016.07.0028          |
|                                                           | Pistacio       | Şahin et al., 2022          | 10.1007/s11033-022-07285-5        |
| <i>Skin color</i>                                         | Apple          | Moriya et al., 2017         | 10.1007/s10681-017-1864-x         |
|                                                           | Apple          | Chagne et al., 2016         | 10.1007/s11295-016-1025-8         |
|                                                           | Peach          | Breto et al., 2017          | 10.1007/s10681-016-1812-1         |
|                                                           | Strawberry     | Labadie et al., 2022        | 10.3389/fpls.2022.869655          |
| <i>Flesh color</i>                                        | Cherry         | Stegmeir et al., 2015       | 10.1007/s11032-015-0337-y         |
|                                                           | Papaya         | Blas et al., 2010           | 10.1104/pp.109.152298             |
|                                                           | Peach          | Adamy et al., 2013          | 10.1007/s11105-013-0628-6         |
| <i>Fruit size and weight</i>                              | Sweet cherry   | De Franceschi et al., 2013  | 10.1007/s11032-013-9872-6         |
|                                                           | Grapevine      | Ban et al., 2016            | 10.1007/s10681-016-1737-8         |
|                                                           | Japanese plum  | Salazar et al., 2020        | 10.1016/j.postharvbio.2020.111292 |
| <i>Seedlessness</i>                                       | Citrus         | Chavez et al., 2011         | 10.21273/HORTSCI.46.5.693         |
|                                                           | Citrus         | JinPing et al., 2009        | 10.1016/j.scienta.2009.03.006     |
|                                                           | Grapevine      | Wang 1997                   |                                   |
|                                                           | Grapevine      | Lahogue et al. 1998         | 10.1007/s001220050976             |
|                                                           | Grapevine      | Mejía and Hinrichsen 2003   | 10.17660/ActaHortic.2003.603.74   |
|                                                           | Grapevine      | Cabezas et al., 2006        | 10.1139/g06-122                   |
|                                                           | Grapevine      | Royo et al., 2018           | 10.1104/pp.18.00259               |
|                                                           | Grapevine      | Wang et al., 2022           | 10.1016/j.jia.2022.07.047         |
| <i>Firmness, crispness, texture</i>                       | Apple          | Costa et al., 2010          | 10.1093/jxb/erq130                |
|                                                           | Apple          | Migicovsky et al., 2021     | 10.3389/fgene.2021.671300         |
|                                                           | Apple          | Longhi et al., 2013         | 10.1007/s11032-013-9912-2         |
|                                                           | Grapevine      | Ban et al., 2016            | 10.1007/s10681-016-1737-8         |
|                                                           | Sweet cherry   | Font i Forcada et al., 2013 | 10.1007/s11295-012-0553-0         |
| <i>Pulp acidity and pH</i>                                | Apple          | Chagne et al., 2019         | 10.1038/s41438-018-0114-2         |
|                                                           | Apricot        | Salazar et al., 2013        | 10.1007/s11105-013-0625-9         |
|                                                           | Cranberry      | Fong et al., 2020           | 10.1007/s11295-020-01432-4        |
|                                                           | Cranberry      | Fong et al., 2021           | 10.1007/s11295-020-01482-8        |
|                                                           | Grapevine      | Ban et al., 2016            | 10.1007/s10681-016-1737-8         |
|                                                           | Peach          | Wang et al., 2016           | 10.1007/s10681-016-1709-z         |
|                                                           | Peach          | Eduardo et al., 2014        | 10.1007/s11295-014-0789-y         |
| <i>VOCs</i>                                               | Strawberry     | Noh et al., 2017            | 10.3233/JBR-160145                |
| <i>Harvesting date, maturity date, ethylene, ripening</i> | Apple          | Larsen et al., 2019         | 10.3835/plantgenome2018.12.0104   |
|                                                           | Peach          | Nunez-Lillo et al., 2015    | 10.1007/s11295-015-0911-9         |
|                                                           | Raspberry      | Graham et al., 2009         | 10.1007/s00122-009-0969-6         |
